# Supplementary material for: Mixed-dimensional 2D/3D heterojunctions between MoS2 and Si(100)
Source: Royal Society of Chemistry journal article supplement (doi:10.1039/c8cp05201h), 2018-01-01
Supplement: c8cp05201h1.pdf [file c8cp05201h1.pdf]

## ELECTRONIC SUPPLEMENTARY INFORMATION (ESI)

# Mixed-dimensional 2D/3D heterojunctions between MoS<sub>2</sub> and Si(100)

Hyunsoo Choi,<sup>†a</sup> Kyung-Ah Min,<sup>†a</sup> Janghwan Cha<sup>a</sup> and Suklyun Hong<sup>\*\*a</sup>

<sup>a</sup> Department of Physics and Graphene Research Institute, Sejong University, Seoul 05006, Korea

<sup>†</sup> These authors contributed equally to this work.

<sup>\*</sup> Author to whom any correspondence should be addressed.

E-mail: hong@sejong.ac.kr

### 1. Electronic charge densities of MoS<sub>2</sub>/Si heterostructures

To identify the electronic charge densities of MoS<sub>2</sub>/Si heterostructures depending on the interaction between two contact materials, we obtain electronic charge densities of (a) MoS<sub>2</sub>/clean Si(100) and (b) MoS<sub>2</sub>/H-covered Si(100) heterostructures in Fig. S1; especially, we obtain cross sectional electronic charge densities at  $x = 3.79$  and  $7.21$  Å (See inset of Fig. S1 for details.). Our calculations show that for the case of MoS<sub>2</sub>/clean Si(100) heterostructure, MoS<sub>2</sub> is hybridized with clean Si(100) due to the strong covalent bonds between S and Si atoms, as shown in Fig. S1(a). On the other hand, S atoms of MoS<sub>2</sub> and H atoms of H-covered Si(100) are not hybridized each other, as shown in Fig. S1(b), indicating the weak van der

Waals (vdW) interaction between them. As a result, we identify that electronic charge densities can be different depending on the binding behaviors between two contact materials.

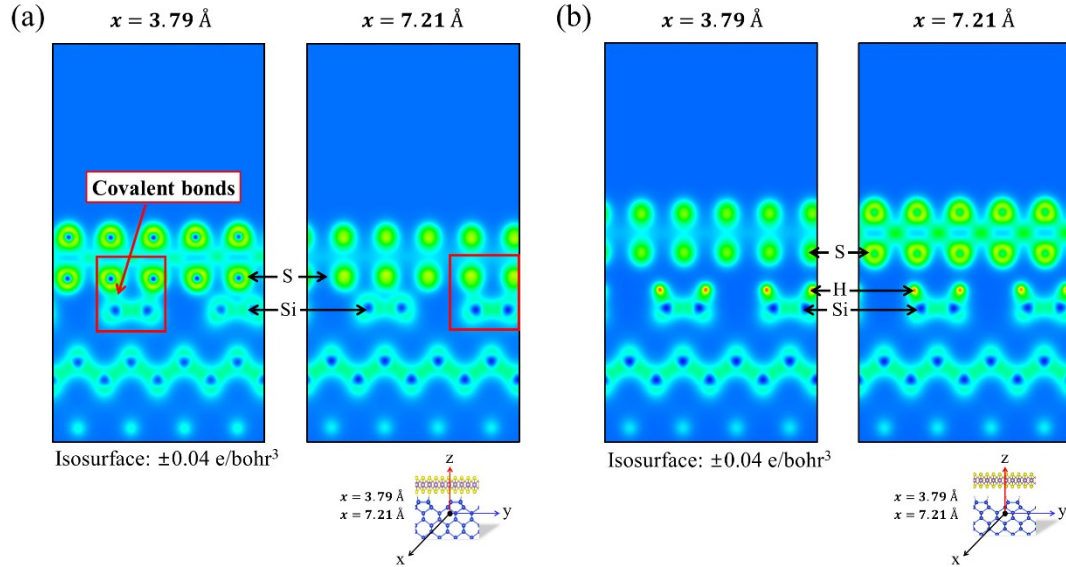

**Fig. S1** Cross sectional electronic charge densities of (a) MoS<sub>2</sub>/clean Si(100) and (b) MoS<sub>2</sub>/H-covered Si(100) at  $x = 3.79$  and  $7.21$  Å. Here, the isosurface level is  $\pm 0.04$  e/bohr<sup>3</sup>.

## 2. Tunneling probability of MoS<sub>2</sub>/clean Si(100) heterojunction

For the MoS<sub>2</sub>/clean Si(100) heterostructure which have possibility of metallic contact, we obtain the tunneling probability ( $T_B$ ) to give the another criterion to the contact characteristics except for the Schottky barrier height (SBH). To estimate the value of  $T_B$ , we calculate the electrostatic potential in Fig. S2. By using the height ( $\sim 1.90$  eV) and width ( $\sim 0.84$  Å) of potential barrier between MoS<sub>2</sub> and clean Si(100) in Fig. S2, we obtain  $T_B$  of about 30 % using Wentzel-Kramers-Brillouin (WKB) approximation:

$$T_B = \exp\left(-2 \times \frac{\sqrt{2m\Delta V}}{\hbar} \times w_B\right) \times 100 (\%)$$

where  $m$ ,  $\Delta V$ , and  $w_B$  are the electron mass, height and width of tunnel barrier, respectively. It means that electrons can pass through MoS<sub>2</sub>/clean Si(100) heterojunctions with the tunneling probability of about 30 %.

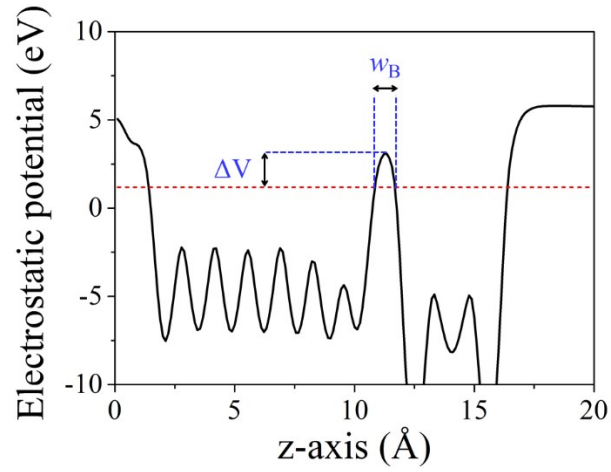

**Fig. S2** Electrostatic potential of MoS<sub>2</sub>/clean Si(100) heterostructure. Fermi level is represented by red dashed line.
